# Supplementary material for: Substitutional transition metal doping in MoSi2N4 monolayer: structural, electronic and magnetic properties
Source: Royal Society of Chemistry journal article supplement (doi:10.1039/d1cp04191f), 2022-01-01
Supplement: d1cp04191f1.pdf [file d1cp04191f1.pdf]

## Supplementary Information (SI)

### Substitutional transition metal doping in $\text{MoSi}_2\text{N}_4$ monolayer: Structural, Electronic and Magnetic Properties

Mohamed A. Abdelati , Ahmed A. Maarou , Mohamed M. Fadlallah

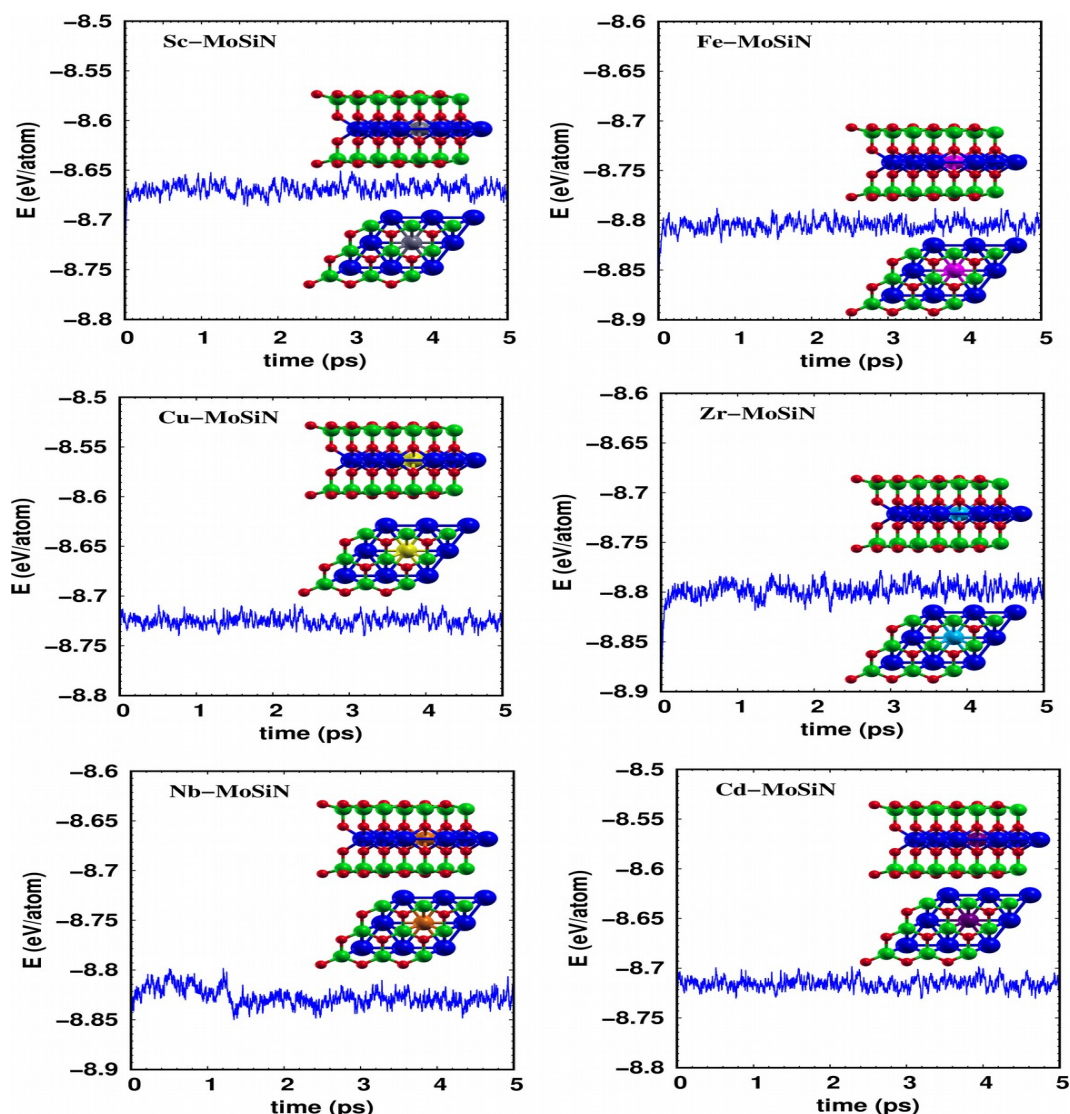

Figure S1. Ab-initio molecular dynamics at 300 K for the Sc-MoSiN, Fe-MoSiN, Cu-MoSiN, Zr-MoSiN, Nb-MoSiN, Cd-MoSiN. The side and top views of atomic structures after AIMD simulation are the inset figures in the corresponding structures (N (red), Si (green), Mo (blue) and TM dopant (Sc (grey), Fe (pink), Cu (yellow), Zr (sky-blue), Nb (dark-yellow) and Cd (violet)).

\*To whom correspondence should be addressed.

Mohamed.fadlallah@fsc.bu.edu.eg

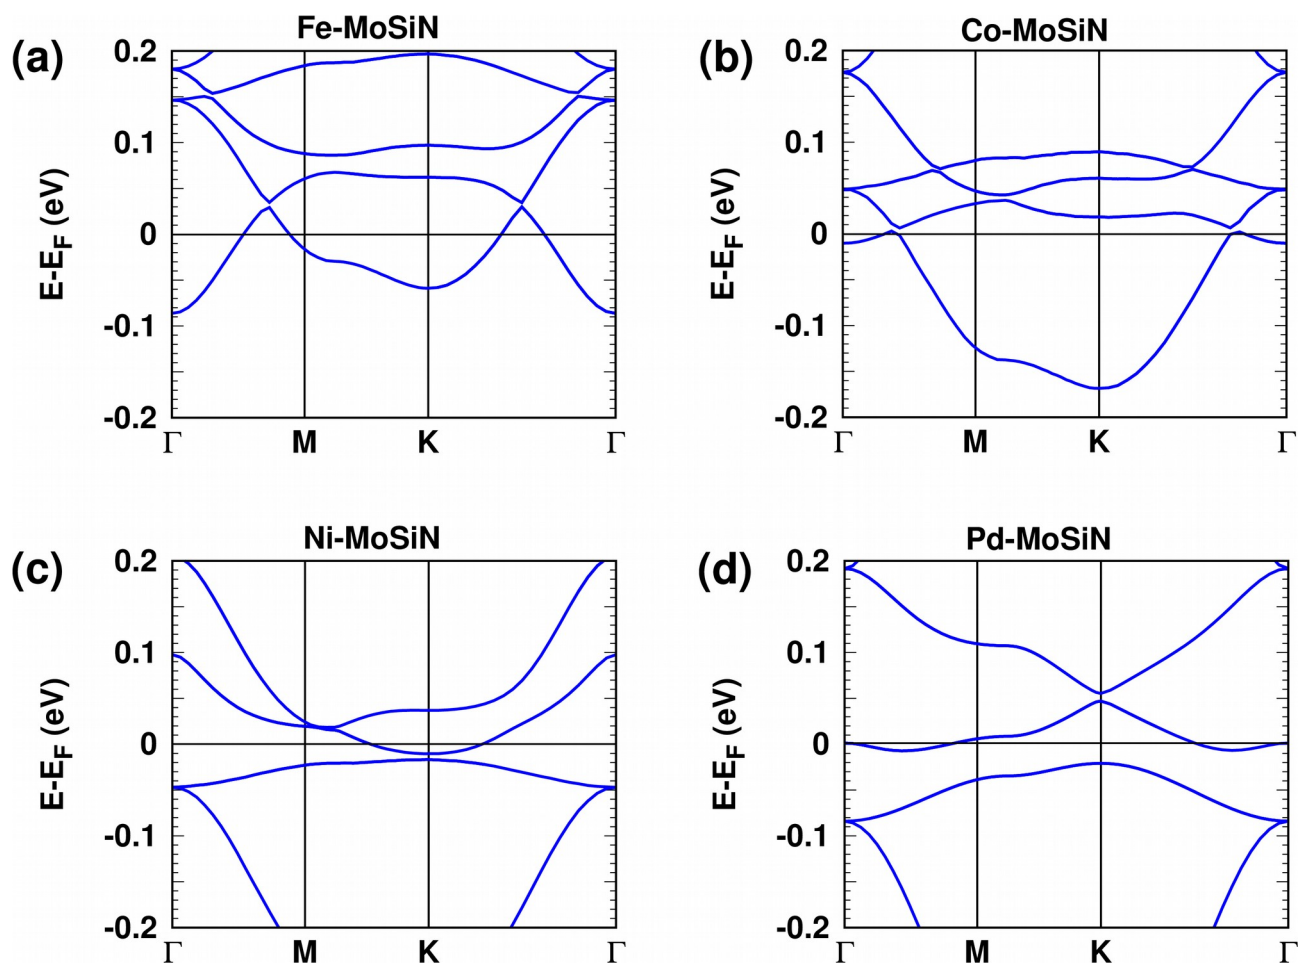

Fig. S2 The band structure of (a) Fe-, (b) Co-, (c) Ni- and (d) Pd-MoSiN monolayers with spin-orbit coupling effect.
